# Supplementary material
Source: PubMed Central journal article supplement (PMC2925231)
Supplement: NIHMS218942-supplement-Supp_Table_S1-S2.pdf [file NIHMS218942-supplement-Supp_Table_S1-S2.pdf]

| Strain          | Characteristics                                                                           | Average $\beta$ -galactosidase activity (Miller units) | Standard deviation | Repression-fold | Fig. |
|-----------------|-------------------------------------------------------------------------------------------|--------------------------------------------------------|--------------------|-----------------|------|
| MG1188          | <i>ompT-lacZ, <math>\Delta</math>omrAB::kan</i>                                           | 448.16                                                 | 28.06              |                 | 2A   |
| MG1194          | MG1188 <i>hfq::cm</i>                                                                     | 597.45                                                 | 16.58              |                 | 2A   |
| MG1173          | <i>ompT-lacZ, wt</i>                                                                      | 408.71                                                 | 23.1               |                 | 2B   |
| MG1447          | MG1173 <i>ArseA::kan</i>                                                                  | 344.32                                                 | 25.02              |                 | 2B   |
| MG1461          | MG1173 <i>ArseA::kan <math>\Delta</math>micA::tet</i>                                     | 403.58                                                 | 9.83               |                 | 2B   |
| MG1188/pBRplac  |                                                                                           | 432.94                                                 | 48.89              |                 | 2C   |
| MG1188/pMicA    |                                                                                           | 139.84                                                 | 16.32              | 3.10            | 2C   |
| MG1188/pMicAmut |                                                                                           | 459.20                                                 | 14.87              | 0.94            | 2C   |
| MG1188/pRybB    |                                                                                           | 453.30                                                 | 6.03               | 0.96            | 2C   |
| MG1188/pOmrA    |                                                                                           | 309.05                                                 | 4.03               | 1.40            | 2C   |
| MG1188/pBRplac  |                                                                                           | 472.98                                                 | 37.95              |                 | 3A   |
| MG1188/pMicA    |                                                                                           | 142.19                                                 | 17.96              | 3.33            | 3A   |
| MG1188/pOmrA    |                                                                                           | 324.47                                                 | 19.91              | 1.46            | 3A   |
| MG1423/pBRplac  | MG1188 <i>phoP ::TnCm</i>                                                                 | 16.05                                                  | 1.57               |                 | 3B   |
| MG1423/pMicA    |                                                                                           | 13.71                                                  | 1.83               | 1.17            | 3B   |
| MG1423/pOmrA    |                                                                                           | 11.56                                                  | 0.66               | 1.39            | 3B   |
| MG1430/vect     | $P_{BAD}$ - <i>phoP-lacZ, <math>\Delta</math>micA::cm</i>                                 | 1052.58                                                | 36.23              |                 | 4B   |
| MG1430/pMicA    |                                                                                           | 290.26                                                 | 14.99              | 3.63            | 4B   |
| MG1430/pMicAmut |                                                                                           | 1301.28                                                | 82.77              | 0.81            | 4B   |
| MG1430/pOmrA    |                                                                                           | 1500.07                                                | 65.28              | 0.70            | 4B   |
| MG1431/vect     | $P_{BAD}$ - <i>phoPmut-lacZ, <math>\Delta</math>micA::cm</i>                              | 996.35                                                 | 82.66              |                 | 4B   |
| MG1431/pMicA    |                                                                                           | 887.80                                                 | 84.81              | 1.12            | 4B   |
| MG1431/pMicAmut |                                                                                           | 497.18                                                 | 14.60              | 2.00            | 4B   |
| MG1431/pOmrA    |                                                                                           | 1402.86                                                | 148.90             | 0.71            | 4B   |
| MG1425          | $P_{BAD}$ - <i>phoP-lacZ</i>                                                              | 1257.75                                                | 159.71             |                 | 4D   |
| MG1459          | $P_{BAD}$ - <i>phoP-lacZ, <math>\Delta</math>arseA::kan</i>                               | 850.84                                                 | 25.51              |                 | 4D   |
| MG1460          | $P_{BAD}$ - <i>phoP-lacZ, <math>\Delta</math>arseA::kan, <math>\Delta</math>micA::tet</i> | 1312.42                                                | 105.70             |                 | 4D   |
| MG1490/pHDB3    | $P_{BAD}$ - <i>phoP-lacZ, <math>\Delta</math>ompA::kan</i>                                | 1448.26                                                | 172.77             |                 | 4E   |
| MG1490/pK4-55   |                                                                                           | 1039.25                                                | 15.10              |                 | 4E   |
| MG1491/pHDB3    | $P_{BAD}$ - <i>phoP-lacZ, <math>\Delta</math>ompA::kan, <math>\Delta</math>micA::tet</i>  | 1214.4                                                 | 54.22              |                 | 4E   |
| MG1491/pK4-55   |                                                                                           | 1465.06                                                | 71.14              |                 | 4E   |
| MG1492/pHDB3    | <i>rybB-lacZ, <math>\Delta</math>ompA::kan</i>                                            | 116.39                                                 | 1.79               |                 | 4E   |
| MG1492/pK4-55   |                                                                                           | 589.00                                                 | 41.95              |                 | 4E   |
| MG1493/pHDB3    | <i>rybB-lacZ, <math>\Delta</math>ompA::kan, <math>\Delta</math>micA::tet</i>              | 102.59                                                 | 7.69               |                 | 4E   |
| MG1493/pK4-55   |                                                                                           | 604.82                                                 | 2.28               |                 | 4E   |
| KM112/pBRplac   | <i>mgrR-lacZ</i>                                                                          | 13987.87                                               | 1083.30            |                 | 5A   |
| KM112/pMicA     |                                                                                           | 4541.00                                                | 1233.99            | 3.08            | 5A   |
| KM112/pMicAmut  |                                                                                           | 15393.71                                               | 815.12             | 0.91            | 5A   |
| KM112/pOmrA     |                                                                                           | 14507.76                                               | 131.65             | 0.96            | 5A   |
| KM194/pBRplac   | <i>yneM-lacZ</i>                                                                          | 409.96                                                 | 23.09              |                 | 5B   |
| KM194/pMicA     |                                                                                           | 153.19                                                 | 1.42               | 2.68            | 5B   |
| KM194/pMicAmut  |                                                                                           | 357.86                                                 | 21.15              | 1.15            | 5B   |

|                 |                                              |         |        |      |    |
|-----------------|----------------------------------------------|---------|--------|------|----|
| KM194/pOmrA     |                                              | 488.33  | 40.40  | 0.84 | 5B |
| MG1484/pBRplac  | <i>P<sub>BAD</sub>-mgrR-lacZ</i>             | 1973.77 | 31.79  |      | 5C |
| MG1484/pMicA    |                                              | 2285.32 | 16.28  | 0.86 | 5C |
| MG1484/pMicAmut |                                              | 2292.84 | 13.21  | 0.86 | 5C |
| MG1484/pOmrA    |                                              | 2253.93 | 154.39 | 0.88 | 5C |
|                 |                                              |         |        |      |    |
| MG1173          | <i>ompT-lacZ, wt</i>                         | 408.26  | 18.14  |      | 6A |
| MG1196          | MG1173 <i>hfq::cm</i>                        | 562.63  | 37.88  |      | 6A |
| MG1451          | MG1173 <i>ΔmicA::tet</i>                     | 452.86  | 54.53  |      | 6A |
| MG1455          | MG1173 <i>ΔmicA::tet hfq::cm</i>             | 637.03  | 58.19  |      | 6A |
| MG1188          | MG1173 <i>ΔomrAB::kan</i>                    | 445.19  | 46.19  |      | 6A |
| MG1194          | MG1173 <i>ΔomrAB::kan hfq::cm</i>            | 545.71  | 41.18  |      | 6A |
| MG1449          | MG1173 <i>ΔmicA::tet ΔomrAB::kan</i>         | 481.26  | 12.30  |      | 6A |
| MG1450          | MG1173 <i>ΔmicA::tet ΔomrAB::kan hfq::cm</i> | 612.11  | 55.54  |      | 6A |
| MG1425          | <i>P<sub>BAD</sub>-phoP-lacZ, wt</i>         | 1226.80 | 192.92 |      | 6B |
| MG1453          | MG1425 <i>hfq::cm</i>                        | 4647.16 | 180.95 |      | 6B |
| MG1452          | MG1425 <i>ΔmicA::tet</i>                     | 1331.49 | 237.50 |      | 6B |
| MG1458          | MG1425 <i>ΔmicA::tet hfq::cm</i>             | 5301.18 | 225.59 |      | 6B |
| MG1446          | <i>ompT-lacZ, phoP::kan</i>                  | 15.26   | 0.47   |      | 6C |
| MG1454          | MG1446 <i>hfq::cm</i>                        | 19.84   | 0.46   |      | 6C |
| MG1456          | MG1446 <i>ΔmicA::tet</i>                     | 18.07   | 0.75   |      | 6C |
| MG1457          | MG1446 <i>ΔmicA::tet hfq::cm</i>             | 20.58   | 2.17   |      | 6C |
| MG1465          | MG1446 <i>ΔomrAB::tet</i>                    | 18.42   | 2.23   |      | 6C |
| MG1466          | MG1446 <i>ΔomrAB::tet hfq::cm</i>            | 27.2    | 2.27   |      | 6C |

Table S1

| Oligonucleotide                 | Sequence 5'-3'                                                           |
|---------------------------------|--------------------------------------------------------------------------|
| <i>ΔmicA</i> :: <i>cm</i> for   | ATTTTCTGAACTCTTTCTTCCCAGGCGAGTCTGAGTATATCCTGTGACGGAAGATCACTTCGC          |
| <i>ΔmicA</i> :: <i>cm</i> rev   | CGCCTGACAGAAAAGAAAAAGGCCACTCGTGAGTGGCCAATTATCACTTATTCAGGCGTAGCACC        |
| <i>ΔmicA</i> :: <i>tet</i> for  | ATTTTCTGAACTCTTTCTTCCCAGGCGAGTCTGAGTATATTCCTAATTTTTGTTGACACTCTA          |
| <i>ΔmicA</i> :: <i>tet</i> rev  | CGCCTGACAGAAAAGAAAAAGGCCACTCGTGAGTGGCCAACTCTTGGGTTATCAAGAGGG             |
| <i>ΔomrAB</i> :: <i>tet</i> for | GCGAAACGCTGTTGCGATTGACCGCTGGTGGCGTTTGGCTTCAGGTTGCTCCTAATTTTTGTTGACACTCTA |
| <i>ΔomrAB</i> :: <i>tet</i> rev | CGCGAGCGACAGTAAATTAGGTGCGAAAAAAACCTGCGCATCCGCGCAGGTTCTTGGGTTATCAAGAGGG   |
| <i>ΔompA</i> :: <i>kan</i> for  | GATTTAACCGTGTTATCTCGTTGGAGATATTCATGGCGTATTTTAAAGCCACGTTGTGTCTCAA         |
| <i>ΔompA</i> :: <i>kan</i> rev  | CCCGCAGCAGCGGGGTTTTTCTACCAGACGAGA ACTTAAGCCTTAGAAAACTCATCGAGC            |
| phoP-lacZ for                   | ACCTGACGCTTTTTATCGCAACTCTCTACTGTTTCTCCATACACTATTTTAATAATTAAGACAGGG       |
| phoP-lacZ rev                   | TAACGCCAGGGTTTTCCAGTCACGACGTTGTAAAACGACCGCATTGTCTTCAACAACCAG             |
| phoPmut                         | CGCATTGTCTTCAACAACCAGTAGCGCCATTTTTATTTCTCCCTGTCTTAATTATTA AAA            |
| 5'P <sub>BAD</sub> -mgrR        | ACCTGACGCTTTTTATCGCAACTCTCTACTGTTTCTCCATGATTCGTTATTCACACAGG              |
| 3' mgrR-lacZ                    | TAACGCCAGGGTTTTCCAGTCACGACGTTGTAAAACGACCATAGCTGTTTCTGTGTGAATAACGAATC     |
| AatII-MicA                      | CGATGACGTCGAAAGACGCGCATTGTGTTATCATC                                      |
| Hind-MicA                       | CGTACAAGCTTCACGCCTGACAGAAAAGAAAAAGGC                                     |
| AatII-RybB                      | CGATGACGTCGCCACTGCTTTTCTTTGATGTCC                                        |
| Eco-RybB                        | CGTACGAATTCGGTAGTAGATAAGTTTTAGATAAC                                      |
| MicAmut for                     | CAAGATACTGACGTCGAAAGAGCGCCATTTGTTATCATCATCCCTG                           |
| MicAmut rev                     | CAGGGATGATGATAACAAATGGCGCTTTTCGACGTCAGTATCTTG                            |
| MicA-probe                      | (Bio)-CCAAAATTTTCATCTCTGAATTCAGGGATGATGATAACAAATG                        |
| OmrA-probe                      | (Bio)-CAGGTTGGTGCAAGAGACAGGGTACGAAGAGCGTACCG                             |
| RybB-probe                      | (Bio)-GCTCCACAAAATGGGGACATCAAAGAAAAGCAGTGGC                              |
| SsrA-probe                      | (Bio)-CGCCACTAACAACTAGCCTGATTAAGTTTTAACGCTTCA                            |

Table S2. Oligonucleotides used in this study
